# Supplementary material
Source: ML conference proceedings conference paper supplement (https://proceedings.neurips.cc/paper_files/paper/2008/hash/7a614fd06c325499f1680b9896beedeb-Abstract.html)
Supplement: Supplementary file 1 [file 7a614fd06c325499f1680b9896beedeb-Supplemental.zip]

---

# Supplementary Information for “Adapting to a Market Shock: Optimal Sequential Market-Making”

---

**Sanmay Das**  
 Department of Computer Science  
 Rensselaer Polytechnic Institute  
 Troy, NY 12180  
 sanmay@cs.rpi.edu

**Malik Magdon-Ismael**  
 Department of Computer Science  
 Rensselaer Polytechnic Institute  
 Troy, NY 12180  
 magdon@cs.rpi.edu

**Mean and Variance Updates in the Gaussian Approximation** (This derives the mean and variance updates given in Equations 2 and 3 in the main paper. It makes use of the Gaussian integrals from Figure 2 in the paper.)

The update to the mean is obtained by computing the expected value for the updated distribution  $p_{t+1}$ ,

$$\begin{aligned}\mu_{t+1} &= \frac{1}{A\sigma_t} \int_{-\infty}^{\infty} dv v \cdot N\left(\frac{v-\mu_t}{\sigma_t}\right) \left[ \Phi\left(\frac{z^+-v}{\sigma_\epsilon}\right) - \Phi\left(\frac{z^--v}{\sigma_\epsilon}\right) \right], \\ &= \frac{1}{A} \int_{-\infty}^{\infty} dv (\mu + \sigma_t v) \cdot N(v) \left[ \Phi\left(\frac{z^+-\mu_t-\sigma_t v}{\sigma_\epsilon}\right) - \Phi\left(\frac{z^--\mu_t-\sigma_t v}{\sigma_\epsilon}\right) \right], \\ &= \mu_t + \frac{\sigma_t}{A} \left[ J\left(\frac{z^+-\mu_t}{\sigma_\epsilon}, \rho_t\right) - J\left(\frac{z^--\mu_t}{\sigma_\epsilon}, \rho_t\right) \right].\end{aligned}$$

Thus, we find that

$$\mu_{t+1} = \mu_t + \sigma_t \cdot \frac{B(z^+, z^-)}{A(z^+, z^-)},$$

To compute the update to the variance, we first compute the second moment,

$$\begin{aligned}E[V^2] &= \frac{1}{A\sigma_t} \int_{-\infty}^{\infty} dv v^2 \cdot N\left(\frac{v-\mu_t}{\sigma_t}\right) \left[ \Phi\left(\frac{z^+-v}{\sigma_\epsilon}\right) - \Phi\left(\frac{z^--v}{\sigma_\epsilon}\right) \right], \\ &= \frac{1}{A} \int_{-\infty}^{\infty} dv (\mu + \sigma_t v)^2 \cdot N(v) \left[ \Phi\left(\frac{z^+-\mu_t-\sigma_t v}{\sigma_\epsilon}\right) - \Phi\left(\frac{z^--\mu_t-\sigma_t v}{\sigma_\epsilon}\right) \right], \\ &= \frac{1}{A} \left( \mu_t^2 A + 2\mu_t \sigma_t B + \sigma_t^2 \left[ K\left(\frac{z^+-\mu_t}{\sigma_\epsilon}, \rho_t\right) - K\left(\frac{z^--\mu_t}{\sigma_\epsilon}, \rho_t\right) \right] \right).\end{aligned}$$

$$E[V^2] = \mu_t^2 + \sigma_t^2 + 2\mu_t \sigma_t \frac{B}{A} - \sigma_t^2 \frac{C}{A}.$$

Since  $\sigma_{t+1}^2 = E[V^2] - \mu_{t+1}^2$ , we finally arrive at

$$\sigma_{t+1}^2 = \sigma_t^2 \left( 1 - \frac{AC + B^2}{A^2} \right).$$

**Proof of Monotonicity of State Update** The proof below is for Theorem 2.1 in the main paper:

**Lemma 0.1.** For all  $x < y$ ,  $(\Phi(y) - \Phi(x))(yN(y) - xN(x)) + (N(x) - N(y))^2 > 0$ .

*Proof.* If  $x \leq 0$ , the claim is obvious, so assume that  $x > 0$ . We begin with the following inequality,

$$x(\Phi(y) - \Phi(x)) < \int_x^y ds sN(s) < y(\Phi(y) - \Phi(x)).$$

Since  $\int_x^y ds sN(s) = N(x) - N(y)$ , we have the following inequality, which establishes the result,  
 $yN(y)(\Phi(y) - \Phi(x)) - xN(x)(\Phi(y) - \Phi(x)) > N(y)(N(x) - N(y)) - N(x)(N(x) - N(y))$

■

**Theorem 0.1** (Monotonic state update).  $\sigma_{t+1}^2 \leq \sigma_t^2$ .

*Proof.* It suffices to show that  $AC + B^2 > 0$ . Define  $s^2 = \sigma_t^2 + \sigma_\epsilon^2$ ,  $\Delta^+ = (z^+ - \mu_t)/s$  and  $\Delta^- = (z^- - \mu_t)/s$ . After some algebraic manipulation, we find that

$$\begin{aligned} A &= \Phi(\Delta^+) - \Phi(\Delta^-), \\ B &= \frac{\sigma_t}{s}(N(\Delta^-) - N(\Delta^+)), \\ C &= \frac{\sigma_t^2}{s^2}(\Delta^+N(\Delta^+) - \Delta^-N(\Delta^-)). \end{aligned}$$

Thus,  $AC + B^2$  is given by

$$\frac{\sigma_t^2}{s^2} [(\Phi(y) - \Phi(x))(yN(y) - xN(x)) + (N(x) - N(y))^2]$$

where  $x = \Delta^-$ ,  $y = \Delta^+$ . Applying Lemma 0.1 concludes the proof.

■
